# Supplementary material
Source: publisher site journal article supplement (https://www.spandidos-publications.com/2068/downloadSupplementary)

Figure S1. Reverse transcription-quantitative PCR analysis showing the expression levels of three differentially expressed genes in the RNA-seq analysis of FOXP3-overexpressing MDA-MB-231 cells vs. control cells. \* $P < 0.05$ , \*\* $P < 0.01$ . PDCD4, programmed cell death 4; FOXP3, forkhead box P3; PGGHG, protein-glucosylgalactosylhydroxylysine glucosidase; SQOR, sulfide quinone oxidoreductase.

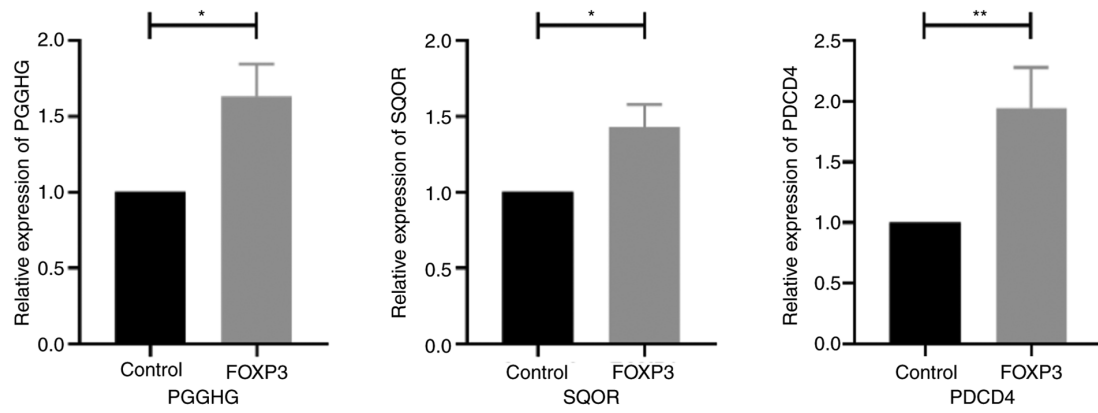

Supplement: Supplementary file 1 [file downloadSupplementary]
